# Supplementary material
Source: PubMed Central journal article supplement (PMC11259034)
Supplement: NIHMS1998278-supplement-appendix.pdf [file NIHMS1998278-supplement-appendix.pdf]

## **Supplementary Appendix**

This appendix has been provided by the authors to give readers additional information about their work.

Supplement to: Tej A. Patel, Jonathan Heintz, Jinbo Chen, et al. Spending Analysis of Machine Learning–Based Communication Nudges in Oncology. *NEJM AI*. DOI: [10.1056/Aloa2300228](https://doi.org/10.1056/Aloa2300228).

## SUPPLEMENT

**Supple. Table 1:** Variables included in machine learning algorithm

| Laboratories                                    | Units       | Features included                                                                                                                                          |
|-------------------------------------------------|-------------|------------------------------------------------------------------------------------------------------------------------------------------------------------|
| Age                                             | Years       |                                                                                                                                                            |
| Gender                                          | Male/Female |                                                                                                                                                            |
| <b>Elixhauser comorbidities</b>                 | Count       | <b>Count of number times comorbidity was ever coded (“total”)</b><br><b>Count of number of times comorbidity was coded in the past 180 days (“recent”)</b> |
| Metastatic cancer                               |             |                                                                                                                                                            |
| Diabetes, uncomplicated                         |             |                                                                                                                                                            |
| Alcohol abuse                                   |             |                                                                                                                                                            |
| Rheumatoid arthritis/collagen vascular diseases |             |                                                                                                                                                            |
| Weight loss                                     |             |                                                                                                                                                            |
| Iron deficiency anemia                          |             |                                                                                                                                                            |
| Lymphoma                                        |             |                                                                                                                                                            |
| Cardiac arrhythmias                             |             |                                                                                                                                                            |
| Pulmonary circulation disorder                  |             |                                                                                                                                                            |
| Liver disease                                   |             |                                                                                                                                                            |
| Obesity                                         |             |                                                                                                                                                            |
| Chronic pulmonary disease                       |             |                                                                                                                                                            |
| Hypertension, uncomplicated                     |             |                                                                                                                                                            |
| Fluid and electrolyte disorders                 |             |                                                                                                                                                            |
| Renal failure                                   |             |                                                                                                                                                            |
| Other neurological disorders                    |             |                                                                                                                                                            |
| Pulmonary valvular disorder                     |             |                                                                                                                                                            |
| Peptic ulcer disease excluding bleeding         |             |                                                                                                                                                            |
| Hypothyroidism                                  |             |                                                                                                                                                            |
| Valvular disease                                |             |                                                                                                                                                            |
| Congestive heart failure                        |             |                                                                                                                                                            |
| Depression                                      |             |                                                                                                                                                            |
| Paralysis                                       |             |                                                                                                                                                            |
| Drug abuse                                      |             |                                                                                                                                                            |
| Diabetes, complicated                           |             |                                                                                                                                                            |
| Coagulopathy                                    |             |                                                                                                                                                            |
| Blood loss anemia                               |             |                                                                                                                                                            |
| Solid tumor without metastasis                  |             |                                                                                                                                                            |
| AIDS/HIV                                        |             |                                                                                                                                                            |
| Hypertension, complicated                       |             |                                                                                                                                                            |
| Psychoses                                       |             |                                                                                                                                                            |
| <b>EKG Values</b>                               |             | <b>Count</b>                                                                                                                                               |
| T Axis                                          | degrees     | <b>First value checked</b>                                                                                                                                 |

|                                |          |                                                                                                                                                                        |
|--------------------------------|----------|------------------------------------------------------------------------------------------------------------------------------------------------------------------------|
| R Axis                         | degrees  | <b>Last value checked</b><br><b>Maximum value</b><br><b>Minimum value</b><br><b>Proportion of Values ordered as STAT</b>                                               |
| P Axis                         | degrees  |                                                                                                                                                                        |
| Q-T Interval                   | ms       |                                                                                                                                                                        |
| QRS Duration                   | ms       |                                                                                                                                                                        |
| P-R Interval                   | ms       |                                                                                                                                                                        |
| QTC Calculation(Bazett)        | ms       |                                                                                                                                                                        |
| Atrial Rate                    | BPM      |                                                                                                                                                                        |
| Ventricular Rate               | BPM      |                                                                                                                                                                        |
| <b>Laboratories</b>            |          | <b>Count</b><br><b>First value checked</b><br><b>Last value checked</b><br><b>Maximum value</b><br><b>Minimum value</b><br><b>Proportion of values ordered as STAT</b> |
| % Basophils Manual             | %        |                                                                                                                                                                        |
| % Eosinophils Manual           | %        |                                                                                                                                                                        |
| Reticulocyte count             | %        |                                                                                                                                                                        |
| % Band Neutrophils             | %        |                                                                                                                                                                        |
| % Lymphocytes Manual           | %        |                                                                                                                                                                        |
| % Eosinophils                  | %        |                                                                                                                                                                        |
| % Basophils                    | %        |                                                                                                                                                                        |
| % Lymphocyte Variants          | %        |                                                                                                                                                                        |
| % Segmented Neutrophils Manual | %        |                                                                                                                                                                        |
| % Monocytes                    | %        |                                                                                                                                                                        |
| % Lymphocytes                  | %        |                                                                                                                                                                        |
| % Myelocytes                   | %        |                                                                                                                                                                        |
| % Monocytes Manual             | %        |                                                                                                                                                                        |
| Alkaline Phosphatase           | IU/L     |                                                                                                                                                                        |
| WBC Corrected                  | THO/uL   |                                                                                                                                                                        |
| Abs Retic                      | THO/uL   |                                                                                                                                                                        |
| # Eosinophils Manual           | THO/uL   |                                                                                                                                                                        |
| # Segmented Neutrophils Manual | THO/uL   |                                                                                                                                                                        |
| # Basophils Manual             | THO/uL   |                                                                                                                                                                        |
| # Monocytes Manual             | THO/uL   |                                                                                                                                                                        |
| # Atypical Lymphocytes         | THO/uL   |                                                                                                                                                                        |
| # Lymphocytes Manual           | THO/uL   |                                                                                                                                                                        |
| AST                            | U/L      |                                                                                                                                                                        |
| Lactate dehydrogenase          | U/L      |                                                                                                                                                                        |
| ALT                            | U/L      |                                                                                                                                                                        |
| UA pH                          | [pH]     |                                                                                                                                                                        |
| # Band Neutrophils             | cells/uL |                                                                                                                                                                        |
| MCV                            | fL       |                                                                                                                                                                        |
| RDW                            | fL       |                                                                                                                                                                        |
| Gamma-Globulin Fraction        | g/dL     |                                                                                                                                                                        |

|                             |               |
|-----------------------------|---------------|
| MCHC                        | g/dL          |
| Beta-Globulin Fraction      | g/dL          |
| Albumin Fraction            | g/dL          |
| Alpha2-Globulin Fraction    | g/dL          |
| Alpha1-Globulin Fraction    | g/dL          |
| % Nucleated Red Blood Cells | k/cumm        |
| % Neutrophils               | k/uL          |
| eGFR, AA                    | mL/min/1.73m2 |
| eGFR, Non-AA                | mL/min/1.73m2 |
| Magnesium                   | mg/dL         |
| Immunoglobulin G            | mg/dL         |
| Immunoglobulin M            | mg/dL         |
| Fibrinogen                  | mg/dL         |
| BUN                         | mg/dL         |
| Urea Nitrogen               | mg/dL         |
| POC Glucose (Fingerstick)   | mg/dL         |
| Glucose                     | mg/dL         |
| Calcium                     | mg/dL         |
| Bilirubin, Indirect         | mg/dL         |
| Uric acid                   | mg/dL         |
| Bilirubin, Direct           | mg/dL         |
| Phosphate                   | mg/dL         |
| Creatinine                  | mg/dL         |
| Hemoglobin                  | mg/dL         |
| Triglycerides               | mm/l          |
| Total Cholesterol           | mm/l          |
| pCO2 Art                    | mmHg          |
| Carbon Dioxide              | mmol/L        |
| Anion Gap                   | mmol/L        |
| Lactic acid                 | mmol/L        |
| Chloride                    | mmol/L        |
| Sodium                      | mmol/L        |
| Potassium                   | mmol/L        |
| Carcinoembryonic antigen    | ng/mL         |
| Ferritin                    | ng/mL         |
| MCH                         | pg            |
| INR                         | ratio         |
| PTT                         | second(s)     |
| PT                          | seconds       |

|                   |          |  |
|-------------------|----------|--|
| TSH               | u[IU]/mL |  |
| Tacrolimus level  | ug/L     |  |
| # Basophils       | x10E3/uL |  |
| # Neutrophils     | x10E3/uL |  |
| # Monocytes       | x10E3/uL |  |
| # Eosinophils     | x10E3/uL |  |
| White blood cells | x10E3/uL |  |
| Platelets         | x10E3/uL |  |
| # Lymphocytes     | x10E3/uL |  |
| Red blood cells   | x10E6/uL |  |
| Albumin           | g/dL     |  |
| Bilirubin, Total  | mg/dL    |  |
| Immunoglobulins A | mg/dL    |  |
| Protein, Total    | g/dL     |  |

**Suppl. Figure 1:** Flowchart depicting the different categorizations of spending used in the study

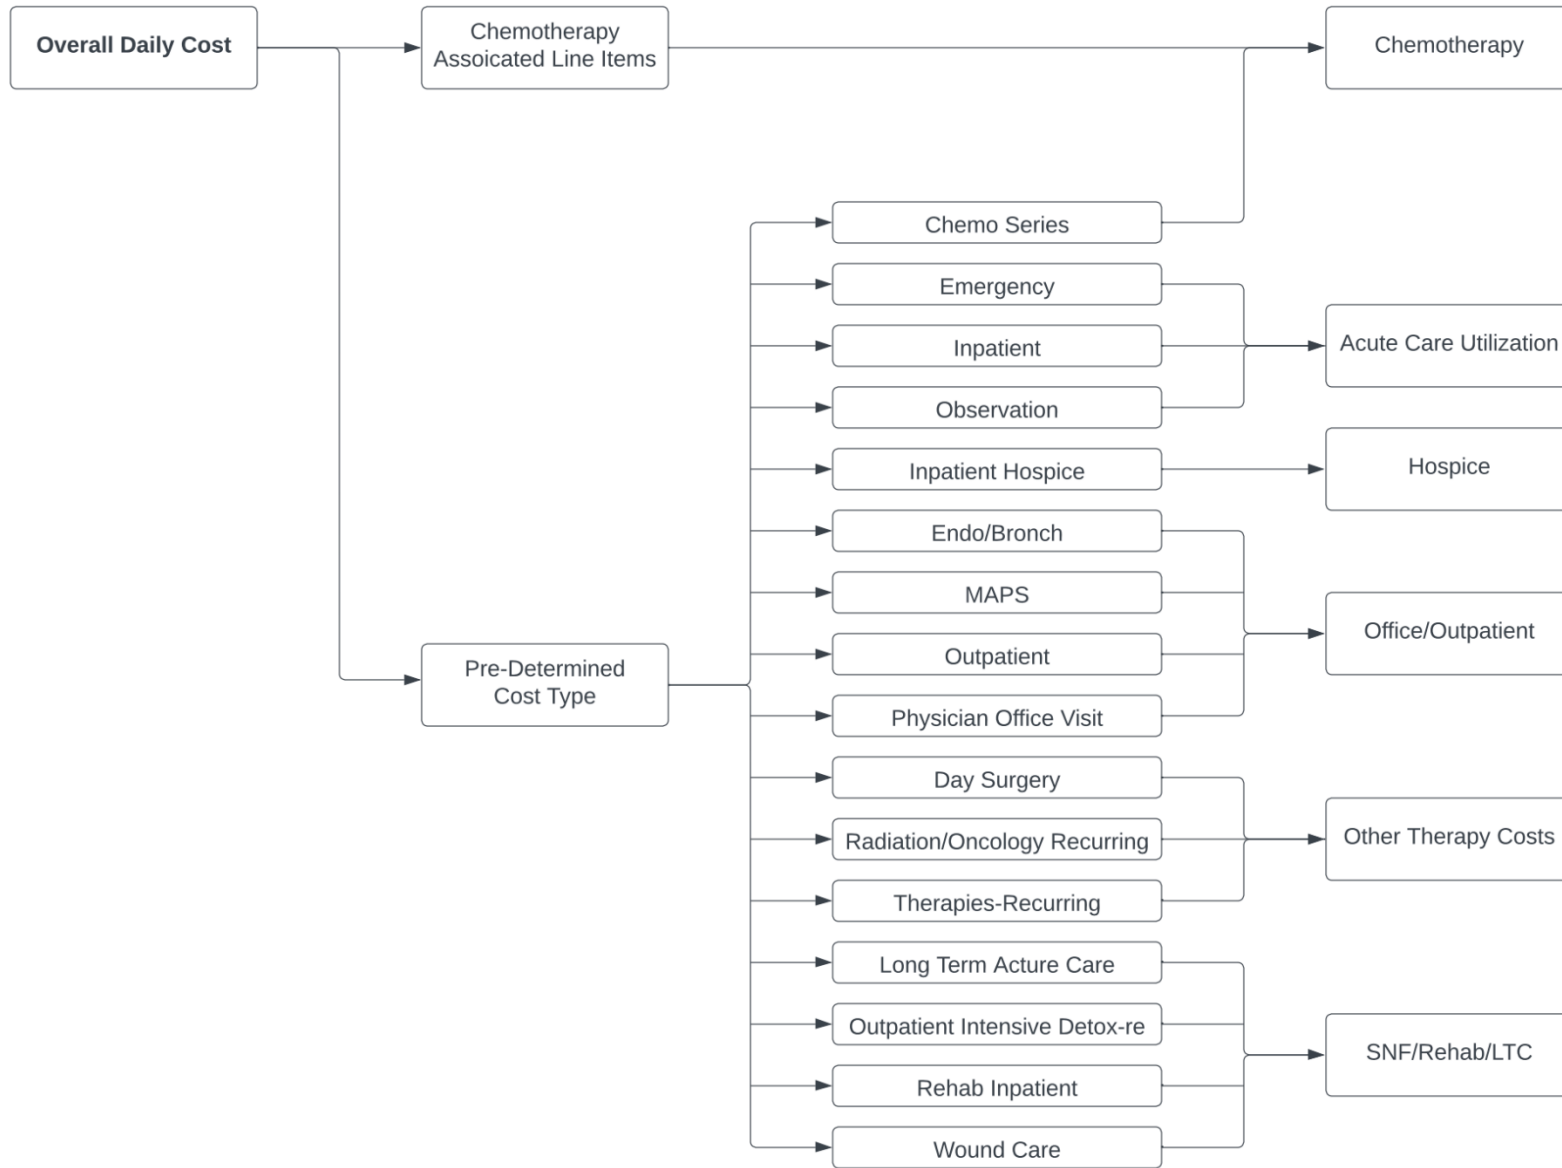

**Suppl. Table 2:** Unadjusted mean total and daily spending, stratified by sectors. Mean daily spending was calculated for 6 months, 3 months, and 1 month before death.

|                                  | Cost type                     | Cohort    | Time before death |             |             |          |             |             |         |            |             |
|----------------------------------|-------------------------------|-----------|-------------------|-------------|-------------|----------|-------------|-------------|---------|------------|-------------|
|                                  |                               |           | 6 months          |             |             | 3 months |             |             | 1 month |            |             |
|                                  |                               |           | N                 | Median      | Mean        | N        | Median      | Mean        | N       | Median     | Mean        |
| <b>Overall</b>                   | <b>Total Spending</b>         | All       | 1187              | \$51,100.40 | \$71,521.87 | 1187     | \$22,768.41 | \$40,133.72 | 1187    | \$654.18   | \$14,021.77 |
|                                  |                               | Treatment | 957               | \$47,559.84 | \$68,977.18 | 957      | \$21,040.98 | \$39,401.71 | 957     | \$547.39   | \$13,588.01 |
|                                  |                               | Control   | 230               | \$63,179.42 | \$82,109.99 | 230      | \$25,936.82 | \$43,179.52 | 230     | \$2,156.57 | \$15,826.56 |
|                                  | <b>Daily Spending</b>         | All       | 1187              | \$280.00    | \$391.90    | 1187     | \$249.52    | \$439.82    | 1187    | \$21.52    | \$461.24    |
|                                  |                               | Treatment | 957               | \$260.60    | \$377.96    | 957      | \$230.59    | \$431.80    | 957     | \$18.01    | \$446.97    |
|                                  |                               | Control   | 230               | \$346.19    | \$449.92    | 230      | \$284.24    | \$473.20    | 230     | \$70.94    | \$520.61    |
| <b>Daily spending by sectors</b> | <b>Acute Care Utilization</b> | All       | 1187              | \$60.84     | \$201.49    | 1187     | \$0.00      | \$270.92    | 1187    | \$0.00     | \$353.18    |
|                                  |                               | Treatment | 957               | \$55.22     | \$201.75    | 957      | \$0.00      | \$272.30    | 957     | \$0.00     | \$346.62    |
|                                  |                               | Control   | 230               | \$81.58     | \$200.42    | 230      | \$69.70     | \$265.19    | 230     | \$0.00     | \$380.48    |
|                                  | <b>Systemic Therapy</b>       | All       | 1187              | \$60.85     | \$122.92    | 1187     | \$27.63     | \$107.42    | 1187    | \$0.00     | \$72.83     |
|                                  |                               | Treatment | 957               | \$48.27     | \$112.97    | 957      | \$17.72     | \$99.71     | 957     | \$0.00     | \$64.92     |
|                                  |                               | Control   | 230               | \$114.87    | \$164.32    | 230      | \$71.16     | \$139.53    | 230     | \$0.00     | \$105.72    |
|                                  | <b>Hospice</b>                | All       | 1187              | \$0.00      | \$0.82      | 1187     | \$0.00      | \$1.64      | 1187    | \$0.00     | \$4.72      |
|                                  |                               | Treatment | 957               | \$0.00      | \$0.89      | 957      | \$0.00      | \$1.78      | 957     | \$0.00     | \$5.34      |
|                                  |                               | Control   | 230               | \$0.00      | \$0.52      | 230      | \$0.00      | \$1.04      | 230     | \$0.00     | \$2.14      |
|                                  | <b>Office/ Outpatient</b>     | All       | 1187              | \$19.15     | \$26.84     | 1187     | \$14.89     | \$23.51     | 1187    | \$0.00     | \$15.84     |
|                                  |                               | Treatment | 957               | \$17.74     | \$24.01     | 957      | \$13.96     | \$22.15     | 957     | \$0.00     | \$14.72     |
|                                  |                               | Control   | 230               | \$23.17     | \$38.61     | 230      | \$17.61     | \$29.13     | 230     | \$0.00     | \$20.50     |
|                                  | <b>Other Therapy</b>          | All       | 1187              | \$0.00      | \$31.43     | 1187     | \$0.00      | \$25.55     | 1187    | \$0.00     | \$10.30     |
|                                  |                               | Treatment | 957               | \$0.00      | \$29.42     | 957      | \$0.00      | \$22.99     | 957     | \$0.00     | \$9.95      |
|                                  |                               | Control   | 230               | \$1.45      | \$39.77     | 230      | \$0.00      | \$36.19     | 230     | \$0.00     | \$11.77     |
|                                  | <b>SNF/ Rehab/ LTC</b>        | All       | 1187              | \$0.00      | \$8.39      | 1187     | \$0.00      | \$10.78     | 1187    | \$0.00     | \$4.34      |
|                                  |                               | Treatment | 957               | \$0.00      | \$8.90      | 957      | \$0.00      | \$12.86     | 957     | \$0.00     | \$5.38      |
|                                  |                               | Control   | 230               | \$0.00      | \$6.28      | 230      | \$0.00      | \$2.11      | 230     | \$0.00     | \$0.00      |

**Suppl. Table 3a:** Daily spending for patients who received at least one serious illness conversation (SIC) before and after the first SIC in the last 6 months of life

| <b>Daily Spending Before and After 1st SIC in Last 6 Months of Life</b> |                    |          |             |                |            |           |               |           |            |
|-------------------------------------------------------------------------|--------------------|----------|-------------|----------------|------------|-----------|---------------|-----------|------------|
| <b>Treatment Group</b>                                                  | <b>Time Period</b> | <b>N</b> | <b>Mean</b> | <b>Std Dev</b> | <b>Min</b> | <b>Q1</b> | <b>Median</b> | <b>Q3</b> | <b>Max</b> |
| All patients                                                            | Before 1st SIC     | 448      | \$329.87    | \$513.57       | \$0.00     | \$0.00    | \$148.82      | \$484.80  | \$6,398.25 |
|                                                                         | After 1st SIC      | 448      | \$291.95    | \$591.47       | \$0.00     | \$0.00    | \$16.74       | \$350.81  | \$5,340.23 |
| Control                                                                 | Before 1st SIC     | 75       | \$390.75    | \$393.18       | \$0.00     | \$19.97   | \$347.57      | \$590.62  | \$1,417.64 |
|                                                                         | After 1st SIC      | 75       | \$258.12    | \$418.15       | \$0.00     | \$0.00    | \$13.92       | \$339.32  | \$2,007.98 |
| Treatment                                                               | Before 1st SIC     | 373      | \$317.63    | \$534.12       | \$0.00     | \$0.00    | \$122.19      | \$441.69  | \$6,398.25 |
|                                                                         | After 1st SIC      | 373      | \$298.75    | \$620.74       | \$0.00     | \$0.00    | \$17.20       | \$352.00  | \$5,340.23 |

**Suppl. Table 3b:** Daily spending for patients in the cohort who received exactly one SIC before and after their first SIC in the last 6 months of life

| <b>Daily Spending Before and After 1st SIC in Last 6 Months of Life (Only Patients with 1 SIC)</b> |                    |          |             |                |            |           |               |           |            |
|----------------------------------------------------------------------------------------------------|--------------------|----------|-------------|----------------|------------|-----------|---------------|-----------|------------|
| <b>Treatment Group</b>                                                                             | <b>Time Period</b> | <b>N</b> | <b>Mean</b> | <b>Std Dev</b> | <b>Min</b> | <b>Q1</b> | <b>Median</b> | <b>Q3</b> | <b>Max</b> |
| All patients                                                                                       | Before 1st SIC     | 293      | \$348.91    | \$569.50       | \$0.00     | \$0.00    | \$151.15      | \$503.11  | \$6,398.25 |
|                                                                                                    | After 1st SIC      | 293      | \$295.19    | \$667.36       | \$0.00     | \$0.00    | \$0.00        | \$311.57  | \$5,340.23 |
| Control                                                                                            | Before 1st SIC     | 54       | \$424.25    | \$409.03       | \$0.00     | \$41.99   | \$371.14      | \$602.24  | \$1,417.64 |
|                                                                                                    | After 1st SIC      | 54       | \$220.22    | \$409.98       | \$0.00     | \$0.00    | \$0.00        | \$254.31  | \$2,007.98 |
| Treatment                                                                                          | Before 1st SIC     | 239      | \$331.88    | \$599.23       | \$0.00     | \$0.00    | \$119.56      | \$454.83  | \$6,398.25 |
|                                                                                                    | After 1st SIC      | 239      | \$312.13    | \$712.34       | \$0.00     | \$0.00    | \$0.00        | \$332.66  | \$5,340.23 |



**Suppl. Table 4:** Proportion of patients that received the intervention, stratified by wedge period

|              |       | wedge(wedge) |      |      |       |       |       |       |
|--------------|-------|--------------|------|------|-------|-------|-------|-------|
|              |       | 0            | 1    | 2    | 3     | 4     | 5     | Total |
| Intervention | No    | 17           | 26   | 22   | 15    | 18    | 132   | 230   |
|              |       | 7.39         | 11.3 | 9.57 | 6.52  | 7.83  | 57.39 |       |
|              |       | 23.29        | 32.1 | 22   | 18.75 | 21.95 | 17.12 |       |
|              | Yes   | 56           | 55   | 78   | 65    | 64    | 639   | 957   |
|              |       | 5.85         | 5.75 | 8.15 | 6.79  | 6.69  | 66.77 |       |
|              |       | 76.71        | 67.9 | 78   | 81.25 | 78.05 | 82.88 |       |
|              | Total | 73           | 81   | 100  | 80    | 82    | 771   | 1187  |

| Key            |
|----------------|
| Frequency      |
| Row Percent    |
| Column Percent |
